# Supplementary material for: ChIP-Seq reveals that QsMYB1 directly targets genes involved in lignin and suberin biosynthesis pathways in cork oak (Quercus suber)
Source: BMC Plant Biol. 2018 Sep 17;18:198. doi: 10.1186/s12870-018-1403-5 (PMC6142680; doi:10.1186/s12870-018-1403-5)
Supplement: Supplementary file 3 — Enzyme peaks. Detected peaks and annotation related with enzyme coding genes. (XLSX 15 kb) [file 12870_2018_1403_MOESM3_ESM.xlsx]

## Sheet: Enzymes
Metabolic Pathway	Enzyme E.C number	Seqs	Annotation	#scaffold_id	#start	#end	#length	#abs_summit	#pileup	#-log10(pvalue)	#fold_enrichment	#-log10(qvalue)	functional_description	binding_feature
Phenylpropanoid Biosynthesis	ec:1.1.1.195 - dehydrogenase	chip1_pooled_pooledMock2-noModelkeepDup8_peak_89281		scaffold_839	238421	238667	247	238483	65.96	18.1891	3.62337	15.3246	gi|169635522|emb|CAP09015.1| cinnamyl alcohol dehydrogenase [Arabidopsis thaliana]	exon
Phenylpropanoid Biosynthesis	ec:1.11.1.7 - lactoperoxidase	chip1_pooled_pooledMock2-noModelkeepDup8_peak_30985		scaffold_2551	133754	134250	497	134105	54.32	16.4392	3.76838	13.7248	gi|18418208|ref|NP_567919.1| probable peroxidase [Arabidopsis thaliana]	exon
Phenylpropanoid Biosynthesis	ec:1.11.1.7 - lactoperoxidase	chip1_pooled_pooledMock2-noModelkeepDup8_peak_32538		scaffold_2646	45765	46074	310	45924	55.87	17.8469	4.03061	15.0055	gi|1419390|emb|CAA67426.1| thylakoid-bound ascorbate peroxidase [Arabidopsis thaliana]	terminator
Phenylpropanoid Biosynthesis	ec:1.11.1.7 - lactoperoxidase	chip1_pooled_pooledMock2-noModelkeepDup8_peak_74404		scaffold_631	115239	115594	356	115408	65.18	28.4545	5.46297	24.8043	gi|21593604|gb|AAM65571.1| peroxidase ATP N [Arabidopsis thaliana]	intron
Phenylpropanoid Biosynthesis	ec:1.11.1.7 - lactoperoxidase	chip1_pooled_pooledMock2-noModelkeepDup8_peak_24825		scaffold_2189	61064	61291	228	61150	64.41	18.1916	3.63377	15.3264	gi|30694586|ref|NP_175380.2| peroxidase [Arabidopsis thaliana]	exon
Phenylpropanoid Biosynthesis	ec:1.11.1.7 - lactoperoxidase	chip1_pooled_pooledMock2-noModelkeepDup8_peak_72672		scaffold_6093	117733	117922	190	117827	57.42	14.1164	3.22445	11.619	gi|18422742|ref|NP_568674.1| peroxidase 65 [Arabidopsis thaliana]	5UTR
Phenylpropanoid Biosynthesis	ec:1.11.1.7 - lactoperoxidase	chip1_pooled_pooledMock2-noModelkeepDup8_peak_18269		scaffold_1815	24538	24763	226	24622	71.39	23.9321	4.25834	20.6144	gi|15219521|ref|NP_177509.1| alpha dioxygenase [Arabidopsis thaliana]	intron
Phenylpropanoid Biosynthesis	ec:1.11.1.7 - lactoperoxidase	chip1_pooled_pooledMock2-noModelkeepDup8_peak_37053		scaffold_2948	67209	67848	640	67347	55.1	18.5427	4.11411	15.6447	gi|15223818|ref|NP_172907.1| peroxidase 5 [Arabidopsis thaliana]	exon
Phenylpropanoid Biosynthesis	ec:1.11.1.7 - lactoperoxidase	chip1_pooled_pooledMock2-noModelkeepDup8_peak_67405		scaffold_5431	115880	116129	250	115943	54.32	18.3179	4.14381	15.4443	gi|15232116|ref|NP_186791.1| alpha-dioxygenase [Arabidopsis thaliana]	3UTR
Phenylpropanoid Biosynthesis	ec:1.11.1.7 - lactoperoxidase	chip1_pooled_pooledMock2-noModelkeepDup8_peak_13389		scaffold_1548	42637	42895	259	42780	61.3	15.1486	3.24787	12.5449	gi|334184290|ref|NP_179414.2| nucleolar complex protein 2-like protein [Arabidopsis thaliana]	intron
Phenylpropanoid Biosynthesis	ec:1.11.1.7 - lactoperoxidase	chip1_pooled_pooledMock2-noModelkeepDup8_peak_80582		scaffold_7156	34477	34675	199	34591	75.27	17.4202	3.15186	14.6174	gi|29888143|gb|AAP03016.1| 4-coumarate-CoA ligase-like protein [Arabidopsis thaliana]	exon
Phenylpropanoid Biosynthesis	ec:1.11.1.7 - lactoperoxidase	chip1_pooled_pooledMock2-noModelkeepDup8_peak_5234		scaffold_1118	6541	6949	409	6802	48.89	8.86381	3.61879	6.87896	gi|15236264|ref|NP_195235.1| catalase 2 [Arabidopsis thaliana]	exon
Phenylpropanoid Biosynthesis	ec:1.11.1.7 - lactoperoxidase	chip1_pooled_pooledMock2-noModelkeepDup8_peak_20230		scaffold_1924	20533	20739	207	20649	59.75	19.2527	4.07512	16.3084	gi|15232929|ref|NP_189460.1| peroxidase 31 [Arabidopsis thaliana]	5UTR
Phenylpropanoid Biosynthesis	ec:1.11.1.7 - lactoperoxidase	chip1_pooled_pooledMock2-noModelkeepDup8_peak_68402		scaffold_5554	63984	64314	331	64154	45.78	15.2911	4.08593	12.6779	gi|15237187|ref|NP_200647.1| peroxidase [Arabidopsis thaliana]	promotor
Phenylpropanoid Biosynthesis	ec:1.11.1.7 - lactoperoxidase	chip1_pooled_pooledMock2-noModelkeepDup8_peak_86973		scaffold_803	91376	91706	331	91547	84.58	36.4857	5.61205	32.3095	gi|21593604|gb|AAM65571.1| peroxidase ATP N [Arabidopsis thaliana]	intron
Phenylpropanoid Biosynthesis	ec:3.2.1.21 - gentiobiase	chip1_pooled_pooledMock2-noModelkeepDup8_peak_78521		scaffold_6877	50800	51120	321	51064	53.54	16.4855	3.84491	13.7669	gi|15224882|ref|NP_181976.1| beta glucosidase 17 [Arabidopsis thaliana]	3UTR
Phenylpropanoid Biosynthesis	ec:3.2.1.21 - gentiobiase	chip1_pooled_pooledMock2-noModelkeepDup8_peak_80078		scaffold_707	133869	134313	445	134154	54.32	22.8661	5.14747	19.6243	gi|18397601|ref|NP_566285.1| beta-glucosidase-like SFR2 [Arabidopsis thaliana]	exon
Phenylpropanoid Biosynthesis	ec:3.2.1.21 - gentiobiase	chip1_pooled_pooledMock2-noModelkeepDup8_peak_34175		scaffold_2752	125387	125667	281	125532	101.66	17.9032	3.70147	15.0589	gi|15241543|ref|NP_199277.1| beta glucosidase 13 [Arabidopsis thaliana]	promotor
Phenylpropanoid Biosynthesis	ec:3.2.1.21 - gentiobiase	chip1_pooled_pooledMock2-noModelkeepDup8_peak_78521		scaffold_6877	50800	51120	321	51064	53.54	16.4855	3.84491	13.7669	gi|15224882|ref|NP_181976.1| beta glucosidase 17 [Arabidopsis thaliana]	3UTR
Phenylpropanoid Biosynthesis	ec:3.2.1.21 - gentiobiase	chip1_pooled_pooledMock2-noModelkeepDup8_peak_80078		scaffold_707	133869	134313	445	134154	54.32	22.8661	5.14747	19.6243	gi|18397601|ref|NP_566285.1| beta-glucosidase-like SFR2 [Arabidopsis thaliana]	exon
Phenylpropanoid Biosynthesis	ec:3.2.1.21 - gentiobiase	chip1_pooled_pooledMock2-noModelkeepDup8_peak_34175		scaffold_2752	125387	125667	281	125532	101.66	17.9032	3.70147	15.0589	gi|15241543|ref|NP_199277.1| beta glucosidase 13 [Arabidopsis thaliana]	promotor
Fatty Acids Biosynthesis	ec:6.4.1.2 - carboxylase	chip1_pooled_pooledMock2-noModelkeepDup8_peak_21821		scaffold_2025	50696	51022	327	50906	60.53	15.7373	3.39221	13.0832	gi|79358114|ref|NP_174849.2| acetyl-CoA carboxylase 1 [Arabidopsis thaliana]	intron
Fatty Acids Biosynthesis	ec:6.4.1.2 - carboxylase	chip1_pooled_pooledMock2-noModelkeepDup8_peak_21822		scaffold_2025	52436	52756	321	52580	84.58	14.209	3.59345	11.696	gi|79358114|ref|NP_174849.2| acetyl-CoA carboxylase 1 [Arabidopsis thaliana]	exon
Fatty Acids Biosynthesis	ec:6.4.1.2 - carboxylase	chip1_pooled_pooledMock2-noModelkeepDup8_peak_21819		scaffold_2025	43453	43855	403	43700	69.06	24.1478	4.37625	20.8084	gi|79358114|ref|NP_174849.2| acetyl-CoA carboxylase 1 [Arabidopsis thaliana]	exon
Fatty Acids Biosynthesis	ec:2.3.1.85 - synthase	chip1_pooled_pooledMock2-noModelkeepDup8_peak_16331		scaffold_1705	129502	129797	296	129647	66.74	19.3806	3.7631	16.4181	gi|18396215|ref|NP_565331.1| enoyl-[acyl-carrier-protein] reductase [NADH] [Arabidopsis thaliana]	intron
Fatty Acids Biosynthesis	ec:1.14.19.2 - 9-desaturase	chip1_pooled_pooledMock2-noModelkeepDup8_peak_23684		scaffold_2128	19266	19585	320	19433	51.99	23.0815	5.54889	19.8252	gi|2583130|gb|AAB82639.1| putative non-LTR retroelement reverse transcriptase [Arabidopsis thaliana]	terminator
Fatty Acids Biosynthesis	ec:6.2.1.3 - ligase	chip1_pooled_pooledMock2-noModelkeepDup8_peak_80582		scaffold_7156	34477	34675	199	34591	75.27	17.4202	3.15186	14.6174	gi|29888143|gb|AAP03016.1| 4-coumarate-CoA ligase-like protein [Arabidopsis thaliana]	exon
Fatty Acids Biosynthesis	ec:1.3.1.9 - reductase (NADH)	chip1_pooled_pooledMock2-noModelkeepDup8_peak_16331		scaffold_1705	129502	129797	296	129647	66.74	19.3806	3.7631	16.4181	gi|18396215|ref|NP_565331.1| enoyl-[acyl-carrier-protein] reductase [NADH] [Arabidopsis thaliana]	intron
Fatty Acids Degradation	ec:1.1.1.1 - dehydrogenase	chip1_pooled_pooledMock2-noModelkeepDup8_peak_11106		scaffold_1439	76844	77056	213	76974	67.51	23.318	4.36743	20.0385	gi|21593758|gb|AAM65725.1| putative dehydrogenase [Arabidopsis thaliana]	intron
Fatty Acids Degradation	ec:1.14.14.1 - monooxygenase	chip1_pooled_pooledMock2-noModelkeepDup8_peak_12136		scaffold_1486	221564	221788	225	221733	66.74	18.3108	3.59151	15.4378	gi|15225914|ref|NP_182121.1| cytochrome P450, family 86, subfamily A, polypeptide 8 [Arabidopsis thaliana]	promotor
Fatty Acids Degradation	ec:1.14.14.1 - monooxygenase	chip1_pooled_pooledMock2-noModelkeepDup8_peak_77969		scaffold_6807	25612	26020	409	25850	40.35	16.2806	4.70862	13.5769	gi|15227788|ref|NP_179899.1| cytochrome P450, family 96, subfamily A, polypeptide 1 [Arabidopsis thaliana]	intron
Fatty Acids Degradation	ec:1.2.1.3 - dehydrogenase (NAD+)	chip1_pooled_pooledMock2-noModelkeepDup8_peak_72804		scaffold_611	130467	130997	531	130629	76.82	24.2098	4.09599	20.8665	gi|15228319|ref|NP_190383.1| aldehyde dehydrogenase 2B4 [Arabidopsis thaliana]	terminator
Fatty Acids Degradation	ec:1.2.1.3 - dehydrogenase (NAD+)	chip1_pooled_pooledMock2-noModelkeepDup8_peak_60822		scaffold_4739	77703	78237	535	77957	71.39	19.8381	3.61959	16.8438	gi|42567452|ref|NP_195348.2| aldehyde dehydrogenase 3F1 [Arabidopsis thaliana]	intron
Fatty Acids Degradation	ec:6.2.1.3 - ligase	chip1_pooled_pooledMock2-noModelkeepDup8_peak_80582		scaffold_7156	34477	34675	199	34591	75.27	17.4202	3.15186	14.6174	gi|29888143|gb|AAP03016.1| 4-coumarate-CoA ligase-like protein [Arabidopsis thaliana]	exon
Fatty Acids Degradation	ec:1.3.3.6 - oxidase	chip1_pooled_pooledMock2-noModelkeepDup8_peak_33424		scaffold_2707	17569	17848	280	17660	72.17	19.9819	3.59353	16.9771	gi|240255949|ref|NP_567513.4| peroxisomal acyl-coenzyme A oxidase 1 [Arabidopsis thaliana]	intron
Fatty Acids Degradation	ec:1.3.3.6 - oxidase	chip1_pooled_pooledMock2-noModelkeepDup8_peak_72373		scaffold_6072	10291	10539	249	10460	116.4	22.3507	3.86341	19.1572	gi|8163758|gb|AAF73843.1|AF207994_1 acyl-CoA oxidase ACX3 [Arabidopsis thaliana]	intron
Glicerolipid Metabolism	ec:1.1.1.2 - dehydrogenase (NADP+)	chip1_pooled_pooledMock2-noModelkeepDup8_peak_52676		scaffold_4013	2563	3001	439	2890	45.01	18.8651	4.91537	15.9449	gi|18390678|ref|NP_563770.1| uncharacterized oxidoreductase [Arabidopsis thaliana]	exon
Glicerolipid Metabolism	ec:1.2.1.3 - dehydrogenase (NAD+)	chip1_pooled_pooledMock2-noModelkeepDup8_peak_72804		scaffold_611	130467	130997	531	130629	76.82	24.2098	4.09599	20.8665	gi|15228319|ref|NP_190383.1| aldehyde dehydrogenase 2B4 [Arabidopsis thaliana]	terminator
Glicerolipid Metabolism	ec:1.2.1.3 - dehydrogenase (NAD+)	chip1_pooled_pooledMock2-noModelkeepDup8_peak_60822		scaffold_4739	77703	78237	535	77957	71.39	19.8381	3.61959	16.8438	gi|42567452|ref|NP_195348.2| aldehyde dehydrogenase 3F1 [Arabidopsis thaliana]	intron
Glicerolipid Metabolism	ec:2.3.1.15 - 1-O-acyltransferase	chip1_pooled_pooledMock2-noModelkeepDup8_peak_69360		scaffold_5670	43295	43711	417	43542	82.26	27.3674	4.27238	23.8024	gi|227202610|dbj|BAH56778.1| AT1G32200 [Arabidopsis thaliana]	5UTR
Glicerolipid Metabolism	ec:1.1.1.21 - reductase	chip1_pooled_pooledMock2-noModelkeepDup8_peak_52676		scaffold_4013	2563	3001	439	2890	45.01	18.8651	4.91537	15.9449	gi|18390678|ref|NP_563770.1| uncharacterized oxidoreductase [Arabidopsis thaliana]	exon
Glicerolipid Metabolism	ec:3.1.1.26 - galactolipid lipase	chip1_pooled_pooledMock2-noModelkeepDup8_peak_55934		scaffold_4311	32579	33101	523	32729	63.63	16.4434	3.40168	13.7285	gi|18403524|ref|NP_564590.1| DAD1-like lipase 2 [Arabidopsis thaliana]	exon
Glicerolipid Metabolism	ec:2.3.1.20 - O-acyltransferase	chip1_pooled_pooledMock2-noModelkeepDup8_peak_90891		scaffold_877	49648	50032	385	49884	65.18	19.3864	3.77546	16.4235	gi|30696326|ref|NP_200151.2| bifunctional wax ester synthase/diacylglycerol acyltransferase [Arabidopsis thaliana]	exon
Glicerolipid Metabolism	ec:3.1.1.3 - lipase	chip1_pooled_pooledMock2-noModelkeepDup8_peak_55934		scaffold_4311	32579	33101	523	32729	63.63	16.4434	3.40168	13.7285	gi|18403524|ref|NP_564590.1| DAD1-like lipase 2 [Arabidopsis thaliana]	exon
Glicerophospholipid Metabolism	ec:1.1.1.8 - dehydrogenase (NAD+)	chip1_pooled_pooledMock2-noModelkeepDup8_peak_41117		scaffold_3227	15141	15397	257	15256	73.72	22.3281	3.93262	19.1357	gi|15227377|ref|NP_181685.1| glycerol-3-phosphate dehydrogenase [NAD(+)] GPDHC1 [Arabidopsis thaliana]	intron
Glicerophospholipid Metabolism	ec:2.1.1.103 - N-methyltransferase	chip1_pooled_pooledMock2-noModelkeepDup8_peak_82952		scaffold_7439	4581	4837	257	4672	50.44	11.9828	3.10253	9.68534	gi|30684743|ref|NP_188427.2| phosphoethanolamine N-methyltransferase 1 [Arabidopsis thaliana]	exon
Glicerophospholipid Metabolism	ec:1.1.1.94 - dehydrogenase [NAD(P)+]	chip1_pooled_pooledMock2-noModelkeepDup8_peak_41117		scaffold_3227	15141	15397	257	15256	73.72	22.3281	3.93262	19.1357	gi|15227377|ref|NP_181685.1| glycerol-3-phosphate dehydrogenase [NAD(+)] GPDHC1 [Arabidopsis thaliana]	intron
Glicerophospholipid Metabolism	ec:2.3.1.15 - 1-O-acyltransferase	chip1_pooled_pooledMock2-noModelkeepDup8_peak_69360		scaffold_5670	43295	43711	417	43542	82.26	27.3674	4.27238	23.8024	gi|227202610|dbj|BAH56778.1| AT1G32200 [Arabidopsis thaliana]	5UTR
Glicerophospholipid Metabolism	ec:3.1.1.32 - A1	chip1_pooled_pooledMock2-noModelkeepDup8_peak_55934		scaffold_4311	32579	33101	523	32729	63.63	16.4434	3.40168	13.7285	gi|18403524|ref|NP_564590.1| DAD1-like lipase 2 [Arabidopsis thaliana]	exon
